# Supplementary material for: How much biomass do plant communities pack per unit volume?
Source: PeerJ. 2015 Mar 19;3:e849. doi: 10.7717/peerj.849 (PMC4369330; doi:10.7717/peerj.849)
Supplement: Table S1 [file peerj-03-849-s001.xlsx]

## Sheet: Feuil1
Appendix 1: Dry standing biomass (g/m2) and height (m) of plant communities from different ecosystems.
Plant species richness	Community height (m)	Dry standing biomass (g/m2)	Ecosystem
	4.11	2680	Cropland_Biofuel
	3.55	2820	Cropland_Biofuel
	1.92	2070	Cropland_Biofuel
	1.75	1580	Cropland_Biofuel
	2.37	1290	Cropland_Biofuel
	3.11	2210	Cropland_Biofuel
	1.36	440	Cropland_Biofuel
	1.25	410	Cropland_Biofuel
	1.17	330	Cropland_Biofuel
	3.69	2240	Cropland_Biofuel
	3.93	3260	Cropland_Biofuel
	2.1	1960	Cropland_Biofuel
	1.88	1960	Cropland_Biofuel
	2.87	1480	Cropland_Biofuel
	2.93	2060	Cropland_Biofuel
	2.8	1900	Cropland_Biofuel
	1.79	770	Cropland_Biofuel
	1.8	920	Cropland_Biofuel
	2.39	1280	Cropland_Biofuel
	2.45	2671	Cropland_Corn
	2.25	1786	Cropland_Corn
	1.8	1747	Cropland_Corn
	2.4	1939	Cropland_Corn
	1.8	1210	Cropland_Corn
	1.75	1564	Cropland_Corn
	1.8	1554	Cropland_Corn
	2.6	2301	Cropland_Corn
	2.55	2119	Cropland_Corn
	2.4	1971	Cropland_Corn
	1.85	1447	Cropland_Corn
	2.3	1548	Cropland_Corn
	2.3	1639	Cropland_Corn
	6.6	8761	Forest_Boreal
	14.1	7064	Forest_Boreal
	10.2	10253	Forest_Boreal
	11.2	8787	Forest_Boreal
	17.7	15376	Forest_Boreal
	14.3	6575	Forest_Boreal
	10.2	9120	Forest_Boreal
	14.4	9663	Forest_Boreal
	16	9203	Forest_Boreal
	12	10051	Forest_Boreal
	11.8	5783	Forest_Boreal
	7.4	2539	Forest_Boreal
	12.5	7991	Forest_Boreal
	21.6	22958	Forest_Boreal
	7.7	4717	Forest_Boreal
	16	18330	Forest_Boreal
	11.8	592	Forest_Boreal
	17.9	12376	Forest_Boreal
	12.4	9781	Forest_Boreal
	8.5	3902	Forest_Boreal
	23.8	13176	Forest_Boreal
	13.2	18693	Forest_Boreal
	16	18330	Forest_Boreal
	9.4	2888	Forest_Boreal
	9.4	10973	Forest_Boreal
	14.1	14986	Forest_Boreal
	9	9068	Forest_Boreal
	18.3	6528	Forest_Boreal
	12.9	10844	Forest_Boreal
	16.5	17846	Forest_Boreal
	8.2	4768	Forest_Boreal
	15.8	17245	Forest_Boreal
	14.7	13397	Forest_Boreal
	8.6	1841	Forest_Boreal
	15	11966	Forest_Boreal
	17.4	12656	Forest_Boreal
	7.9	6824	Forest_Boreal
	11.7	4371	Forest_Boreal
	15.1	14047	Forest_Boreal
	9.3	4842	Forest_Boreal
	14	5119	Forest_Boreal
	18.4	15426	Forest_Boreal
	12.9	12639	Forest_Boreal
	17.7	17454	Forest_Boreal
	14	8698	Forest_Boreal
	11.4	3722	Forest_Boreal
	13.3	12967	Forest_Boreal
	19	13688	Forest_Boreal
	18	13024	Forest_Boreal
	12	6385	Forest_Boreal
	11.2	6829	Forest_Boreal
	7.5	1618	Forest_Boreal
	6.3	3306	Forest_Boreal
	8.2	3799	Forest_Boreal
	8.1	6702	Forest_Boreal
	8	5189	Forest_Boreal
	11.7	13475	Forest_Boreal
	14.3	14946	Forest_Boreal
	8	2944	Forest_Boreal
	8.4	4120	Forest_Boreal
	5.9	487	Forest_Boreal
	10.7	9159	Forest_Boreal
	9.6	6084	Forest_Boreal
	13.1	9515	Forest_Boreal
	17.8	21797	Forest_Boreal
	6.4	1525	Forest_Boreal
	16.1	9290	Forest_Boreal
	8.1	168	Forest_Boreal
	19.5	16237	Forest_Boreal
	8.7	4283	Forest_Boreal
	14	3630	Forest_Boreal
	11	4486	Forest_Boreal
	12.3	6544	Forest_Boreal
	12.9	10229	Forest_Boreal
	12.5	6998	Forest_Boreal
	9.1	4328	Forest_Boreal
	6.8	2020	Forest_Boreal
	12.3	9795	Forest_Boreal
	9	5665	Forest_Boreal
	8.4	1556	Forest_Boreal
	19	4579	Forest_Boreal
	16.8	7404	Forest_Boreal
	17.7	13046	Forest_Boreal
	17.5	11485	Forest_Boreal
	16.8	9016	Forest_Boreal
	20.7	8963	Forest_Boreal
	10.4	6710	Forest_Boreal
	7	4472	Forest_Boreal
	15.4	15061	Forest_Boreal
	13.5	9225	Forest_Boreal
	12.6	10682	Forest_Boreal
	8	5435	Forest_Boreal
	10.2	7897	Forest_Boreal
	10.3	1948	Forest_Boreal
	16.6	19705	Forest_Boreal
	8.6	6079	Forest_Boreal
	7.6	1914	Forest_Boreal
	6.8	1632	Forest_Boreal
	6.3	899	Forest_Boreal
	15.4	5979	Forest_Boreal
	13.1	5112	Forest_Boreal
	9.2	2873	Forest_Boreal
	8.1	3235	Forest_Boreal
	12.3	8233	Forest_Boreal
	14.7	2219	Forest_Boreal
	9	8331	Forest_Boreal
	12.8	4531	Forest_Boreal
	6.5	2161	Forest_Boreal
	5.7	1009	Forest_Boreal
	26.2	15922	Forest_Boreal
	13.8	11393	Forest_Boreal
	21.6	26292	Forest_Boreal
	12.7	9217	Forest_Boreal
	10.7	3983	Forest_Boreal
	26.2	15922	Forest_Boreal
	13.8	11393	Forest_Boreal
	21.6	26292	Forest_Boreal
	12.7	9217	Forest_Boreal
	10.7	3983	Forest_Boreal
	19.2	18048	Forest_Boreal
	8.3	4156	Forest_Boreal
	12.3	9923	Forest_Boreal
	20.4	11524	Forest_Boreal
	18.9	16397	Forest_Boreal
	12.4	4466	Forest_Boreal
	13.2	6648	Forest_Boreal
	20.2	11438	Forest_Pacific
	31.5	35954	Forest_Pacific
	26.6	48504	Forest_Pacific
	36.9	57044	Forest_Pacific
	12.7	19751	Forest_Pacific
	8.3	5969	Forest_Pacific
	15.6	28088	Forest_Pacific
	20.4	32645	Forest_Pacific
	10.9	14809	Forest_Pacific
	7.4	941	Forest_Pacific
	18.9	12088	Forest_Pacific
	20.8	37616	Forest_Pacific
	14.7	14742	Forest_Pacific
	10.9	23326	Forest_Pacific
	21.7	40107	Forest_Pacific
	9.2	6814	Forest_Pacific
	34.6	64315	Forest_Pacific
	15.5	34185	Forest_Pacific
	22.5	28178	Forest_Pacific
	30.7	22884	Forest_Pacific
	19.3	20442	Forest_Pacific
	8.2	27734	Forest_Pacific
	21.5	23523	Forest_Pacific
	14.9	70562	Forest_Pacific
	32.6	52969	Forest_Pacific
	40.2	79560	Forest_Pacific
	43	47218	Forest_Pacific
	22.3	27346	Forest_Pacific
	35.8	50484	Forest_Pacific
	28.9	57691	Forest_Pacific
	23.6	62913	Forest_Pacific
	22.2	26858	Forest_Pacific
	21	27417	Forest_Pacific
	38.7	57098	Forest_Pacific
	8.2	319	Forest_Pacific
	34.4	58499	Forest_Pacific
	15.7	26032	Forest_Pacific
	13.4	22593	Forest_Pacific
	34.9	84252	Forest_Pacific
	10.9	6589	Forest_Pacific
	26.8	72850	Forest_Pacific
	23.6	25487	Forest_Pacific
	26.1	41707	Forest_Pacific
	17.7	16819	Forest_Pacific
	6.4	704	Forest_Pacific
	20	16200	Forest_Temperate
	20	15100	Forest_Temperate
	15	10200	Forest_Temperate
	9	6600	Forest_Temperate
	9	8800	Forest_Temperate
	16	13000	Forest_Temperate
	16	17000	Forest_Temperate
	36	50000	Forest_Temperate
	27	22000	Forest_Temperate
	6.8	2026	Forest_Temperate
	7.5	614	Forest_Temperate
	10.8	8876	Forest_Temperate
	12.3	5497	Forest_Temperate
	16.4	8018	Forest_Temperate
	8.8	3610	Forest_Temperate
	15.6	8639	Forest_Temperate
	16.7	11729	Forest_Temperate
	15.5	7015	Forest_Temperate
	7	1625	Forest_Temperate
	13.5	1938	Forest_Temperate
	22.4	10995	Forest_Temperate
	14.4	5767	Forest_Temperate
	7.8	4870	Forest_Temperate
	13.5	2702	Forest_Temperate
	18.1	10344	Forest_Temperate
	13.2	5710	Forest_Temperate
	16.5	15024	Forest_Temperate
	15.4	9961	Forest_Temperate
	16.9	12639	Forest_Temperate
	15.3	11173	Forest_Temperate
	17.9	5188	Forest_Temperate
	12	8248	Forest_Temperate
	15.1	14891	Forest_Temperate
	22.9	18772	Forest_Temperate
	11	5304	Forest_Temperate
	9.7	1309	Forest_Temperate
	19.3	9799	Forest_Temperate
	15.9	13486	Forest_Temperate
	9.5	9350	Forest_Temperate
	11.8	17255	Forest_Temperate
	18.3	17853	Forest_Temperate
	16.6	14885	Forest_Temperate
	10.7	4412	Forest_Temperate
	11.1	4438	Forest_Temperate
	16.4	565	Forest_Temperate
	17.3	13007	Forest_Temperate
	9.6	2176	Forest_Temperate
	19.2	12550	Forest_Temperate
	8.1	450	Forest_Temperate
	16.7	7425	Forest_Temperate
	12.5	12676	Forest_Temperate
	13.6	8400	Forest_Temperate
	15	8272	Forest_Temperate
	16.4	9342	Forest_Temperate
	10.5	3844	Forest_Temperate
	25.8	24719	Forest_Temperate
	17.7	20029	Forest_Temperate
	10.1	6662	Forest_Temperate
	17	13223	Forest_Temperate
	16.3	9021	Forest_Temperate
	18.7	10342	Forest_Temperate
	13.9	12112	Forest_Temperate
	16.8	4111	Forest_Temperate
	14	8392	Forest_Temperate
	15.1	11767	Forest_Temperate
	10.8	2684	Forest_Temperate
	16.7	5759	Forest_Temperate
	17.7	11657	Forest_Temperate
	15.1	13806	Forest_Temperate
	16.1	7751	Forest_Temperate
	17.5	5562	Forest_Temperate
	16	12530	Forest_Temperate
	17.6	3861	Forest_Temperate
	10.8	5370	Forest_Temperate
	13.1	11074	Forest_Temperate
	8.3	797	Forest_Temperate
	18.5	21680	Forest_Temperate
	15.8	13051	Forest_Temperate
	8.9	1849	Forest_Temperate
	15.8	12827	Forest_Temperate
	24.2	10697	Forest_Temperate
	19.1	7118	Forest_Temperate
	15.7	30175	Forest_Temperate
	13.7	9971	Forest_Temperate
	15.4	26420	Forest_Temperate
	15.5	9322	Forest_Temperate
	11.9	3103	Forest_Temperate
	17.2	15854	Forest_Temperate
	19.9	8445	Forest_Temperate
	8	543	Forest_Temperate
	19.6	22199	Forest_Temperate
	18	4602	Forest_Temperate
	16.6	11869	Forest_Temperate
	7.6	3463	Forest_Temperate
	16.6	11962	Forest_Temperate
	15.8	11593	Forest_Temperate
	17.6	13036	Forest_Temperate
	18.6	12470	Forest_Temperate
	15.5	12921	Forest_Temperate
	16.2	18229	Forest_Temperate
	14.3	11071	Forest_Temperate
	17.6	20623	Forest_Temperate
	17	14611	Forest_Temperate
	15.1	10698	Forest_Temperate
	15.1	12451	Forest_Temperate
	15.8	7588	Forest_Temperate
	17	10241	Forest_Temperate
	14.7	5276	Forest_Temperate
	14	5829	Forest_Temperate
	18.4	14653	Forest_Temperate
	17.6	15552	Forest_Temperate
	21.4	22114	Forest_Temperate
	17.9	6101	Forest_Temperate
	16.2	13729	Forest_Temperate
	13.7	12345	Forest_Temperate
	17.2	19540	Forest_Temperate
	16.8	12355	Forest_Temperate
	13.4	7321	Forest_Temperate
	23.8	20693	Forest_Temperate
	20.1	15159	Forest_Temperate
	16.4	9078	Forest_Temperate
	19.7	18554	Forest_Temperate
	19.8	16098	Forest_Temperate
	18.8	7631	Forest_Temperate
	20.6	21117	Forest_Temperate
	23.7	20154	Forest_Temperate
	19.5	18749	Forest_Temperate
	23.1	24479	Forest_Temperate
	19.5	22296	Forest_Temperate
	20.8	18439	Forest_Temperate
	14.4	3893	Forest_Temperate
	17.1	16724	Forest_Temperate
	11.8	8846	Forest_Temperate
	15.9	14553	Forest_Temperate
	14.3	10314	Forest_Temperate
	18.5	21344	Forest_Temperate
	18.3	24096	Forest_Temperate
	19.5	14015	Forest_Temperate
	13.9	10784	Forest_Temperate
	20.9	19649	Forest_Temperate
	18.9	16934	Forest_Temperate
	16.9	15504	Forest_Temperate
	12.2	4225	Forest_Temperate
	12.6	7848	Forest_Temperate
	18.5	15218	Forest_Temperate
	15.9	11995	Forest_Temperate
	13.3	11387	Forest_Temperate
	16.7	18090	Forest_Temperate
	17.9	13828	Forest_Temperate
	11.9	2814	Forest_Temperate
	17	11957	Forest_Temperate
	15.8	14141	Forest_Temperate
	13.1	12574	Forest_Temperate
	12.7	13754	Forest_Temperate
	23.8	23395	Forest_Temperate
	24	18751	Forest_Temperate
	11.8	5610	Forest_Temperate
	10	12881	Forest_Temperate
	23.9	35462	Forest_Temperate
	14.1	11268	Forest_Temperate
	14.9	14287	Forest_Temperate
	11.3	7700	Forest_Temperate
	21.2	18237	Forest_Temperate
	11.2	5129	Forest_Temperate
	24.3	13913	Forest_Temperate
	26	23983	Forest_Temperate
	22	16561	Forest_Temperate
	18.7	15170	Forest_Temperate
	14.9	16648	Forest_Temperate
	14.8	12707	Forest_Temperate
	21.6	12281	Forest_Temperate
	26.9	20635	Forest_Temperate
	24	20620	Forest_Temperate
	12.9	3894	Forest_Temperate
	30	19790	Forest_Tropical
	17	19910	Forest_Tropical
	20	13580	Forest_Tropical
	5	8390	Forest_Tropical
	29	16820	Forest_Tropical
	44	33760	Forest_Tropical
	42	29000	Forest_Tropical
	20	13190	Forest_Tropical
	22	17910	Forest_Tropical
	22	23150	Forest_Tropical
	27	31500	Forest_Tropical
	36	36000	Forest_Tropical
	36	28600	Forest_Tropical
	48	65500	Forest_Tropical
	57	46700	Forest_Tropical
	57	46680	Forest_Tropical
	61	41370	Forest_Tropical
	61	42370	Forest_Tropical
	70	50195	Forest_Tropical
5	0.85	2488.8	Grassland
5	1.19	3467.2	Grassland
2	0.85	1240.8	Grassland
5	0.91	997.6	Grassland
6	1.1	1554.4	Grassland
9	0.54	814.4	Grassland
3	1.02	1647.2	Grassland
7	0.58	844	Grassland
3	0.73	1216	Grassland
4	0.83	633.6	Grassland
4	0.88	1372.8	Grassland
5	0.49	227.2	Grassland
7	0.76	1611.2	Grassland
8	0.42	488.8	Grassland
2	0.85	748	Grassland
3	1	1396.8	Grassland
4	1.08	2548	Grassland
2	1.17	3025.6	Grassland
4	1.1	2011.2	Grassland
1	0.78	1712	Grassland
8	0.62	496	Grassland
7	0.65	889.6	Grassland
4	0.83	1639.2	Grassland
3	0.77	1207.2	Grassland
2	0.9	904.8	Grassland
7	0.74	544.8	Grassland
3	1.07	2185.12	Grassland
5	0.65	1466.08	Grassland
4	1.09	1644.64	Grassland
3	1.3	797.44	Grassland
6	1.32	946.4	Grassland
6	1.2	1896.96	Grassland
4	1.19	774.4	Grassland
5	1.08	644.64	Grassland
4	1.2	688	Grassland
3	0.94	1026.72	Grassland
5	1.63	1390.24	Grassland
4	1.16	1101.76	Grassland
2	1.38	866.56	Grassland
1	1.06	1546.08	Grassland
4	1.45	823.84	Grassland
4	1.1	1154.88	Grassland
8	1.4	987.52	Grassland
3	1.24	810.4	Grassland
6	1.18	1017.12	Grassland
5	1.16	487.36	Grassland
4	1.5	859.36	Grassland
3	1.28	639.52	Grassland
4	1.21	1463.36	Grassland
5	1.21	493.28	Grassland
1	1.46	2406.72	Grassland
1	1.43	1230.72	Grassland
6	1.51	1193.12	Grassland
8	0.15	97.71	Meadow_08spp
8	1	469.73	Meadow_08spp
8	0.71	286.17	Meadow_08spp
8	0.23	65.36	Meadow_08spp
8	0.56	220.7	Meadow_08spp
8	0.3	115.3	Meadow_08spp
8	0.56	176.4	Meadow_08spp
8	0.29	115.83	Meadow_08spp
8	0.49	194.05	Meadow_08spp
8	0.16	40.52	Meadow_08spp
8	0.25	184.38	Meadow_08spp
8	0.64	498.33	Meadow_08spp
8	0.56	334.67	Meadow_08spp
8	0.28	225.83	Meadow_08spp
8	0.53	442.13	Meadow_08spp
8	0.28	206.08	Meadow_08spp
8	0.66	469.1	Meadow_08spp
8	0.41	389.97	Meadow_08spp
8	0.38	309.55	Meadow_08spp
8	0.18	162.73	Meadow_08spp
8	0.71	434.33	Meadow_08spp
8	0.77	643.25	Meadow_08spp
8	0.64	378.33	Meadow_08spp
8	0.63	321.17	Meadow_08spp
8	0.67	1021.09	Meadow_08spp
8	0.57	180	Meadow_08spp
8	0.49	485.4	Meadow_08spp
8	0.44	106.13	Meadow_08spp
8	0.24	60.5	Meadow_08spp
8	0.25	101.3	Meadow_08spp
8	0.38	337.3	Meadow_08spp
8	0.65	333.78	Meadow_08spp
8	0.55	234.33	Meadow_08spp
8	0.17	75.32	Meadow_08spp
8	0.41	192.89	Meadow_08spp
8	0.18	98.66	Meadow_08spp
8	0.35	307.75	Meadow_08spp
8	0.16	161	Meadow_08spp
8	0.29	289.74	Meadow_08spp
8	0.1	81.4	Meadow_08spp
8	0.11	117.7	Meadow_08spp
8	0.66	722.38	Meadow_08spp
8	0.32	194.27	Meadow_08spp
8	0.13	47.3	Meadow_08spp
8	0.44	108.33	Meadow_08spp
8	0.18	86.85	Meadow_08spp
8	0.34	363.72	Meadow_08spp
8	0.59	144.43	Meadow_08spp
8	0.46	208.2	Meadow_08spp
8	0.11	60.37	Meadow_08spp
8	0.26	131.33	Meadow_08spp
8	0.97	698.65	Meadow_08spp
8	0.6	299.33	Meadow_08spp
8	0.08	94.71	Meadow_08spp
8	0.56	233.2	Meadow_08spp
8	0.27	87.43	Meadow_08spp
8	0.22	311.28	Meadow_08spp
8	0.15	298.2	Meadow_08spp
8	0.32	237.82	Meadow_08spp
8	0.1	92.27	Meadow_08spp
8	0.18	112.1	Meadow_08spp
8	0.59	191.5	Meadow_08spp
8	0.28	117.83	Meadow_08spp
8	0.15	83.91	Meadow_08spp
8	0.41	487.85	Meadow_08spp
8	0.14	110.79	Meadow_08spp
8	0.22	275.24	Meadow_08spp
8	0.21	270.5	Meadow_08spp
8	0.24	448.46	Meadow_08spp
8	0.07	167	Meadow_08spp
8	0.36	107.88	Meadow_08spp
8	0.87	906.25	Meadow_08spp
8	0.61	662.93	Meadow_08spp
8	0.14	262.91	Meadow_08spp
8	0.68	723.43	Meadow_08spp
8	0.43	226.93	Meadow_08spp
8	0.81	1233.55	Meadow_08spp
8	0.15	438.63	Meadow_08spp
8	0.48	488.88	Meadow_08spp
8	0.19	135.43	Meadow_08spp
8	0.32	356.48	Meadow_08spp
8	1.02	547.45	Meadow_08spp
8	0.59	254.18	Meadow_08spp
8	0.35	75.62	Meadow_08spp
8	0.64	241.37	Meadow_08spp
8	0.35	116.26	Meadow_08spp
8	0.66	310.25	Meadow_08spp
8	0.52	192.78	Meadow_08spp
8	0.45	318.23	Meadow_08spp
8	0.42	126.59	Meadow_08spp
8	0.39	575.35	Meadow_08spp
8	0.67	672.8	Meadow_08spp
8	0.56	662.23	Meadow_08spp
8	0.4	240.14	Meadow_08spp
8	0.75	1539.3	Meadow_08spp
8	0.38	259.86	Meadow_08spp
8	0.85	987.9	Meadow_08spp
8	0.48	269.87	Meadow_08spp
8	0.63	365.03	Meadow_08spp
8	0.22	62.07	Meadow_08spp
8	0.32	432	Meadow_08spp
8	0.92	1025.69	Meadow_08spp
8	0.56	785.25	Meadow_08spp
8	0.45	209.81	Meadow_08spp
8	0.78	1116.92	Meadow_08spp
8	0.36	215.04	Meadow_08spp
8	0.8	920.78	Meadow_08spp
8	0.42	235.17	Meadow_08spp
8	0.58	236.13	Meadow_08spp
8	0.28	347.54	Meadow_08spp
8	0.34	294.18	Meadow_08spp
8	0.96	835.59	Meadow_08spp
8	0.57	314.08	Meadow_08spp
8	0.21	168.4	Meadow_08spp
8	0.59	506.34	Meadow_08spp
8	0.33	234.48	Meadow_08spp
8	0.5	406.75	Meadow_08spp
8	0.3	301.1	Meadow_08spp
8	0.42	281.2	Meadow_08spp
8	0.23	155.84	Meadow_08spp
8	0.2	195.93	Meadow_08spp
8	0.62	129.7	Meadow_08spp
8	0.47	160.84	Meadow_08spp
8	0.08	34.96	Meadow_08spp
8	0.13	108.73	Meadow_08spp
8	0.12	69.79	Meadow_08spp
8	0.12	136.76	Meadow_08spp
8	0.11	56.11	Meadow_08spp
8	0.19	108.34	Meadow_08spp
8	0.1	29.09	Meadow_08spp
8	0.25	91.53	Meadow_08spp
8	0.57	163.63	Meadow_08spp
8	0.6	94.15	Meadow_08spp
8	0.12	58.3	Meadow_08spp
8	0.19	129.85	Meadow_08spp
8	0.13	64.84	Meadow_08spp
8	0.25	232.4	Meadow_08spp
8	0.14	120.31	Meadow_08spp
8	0.23	75.58	Meadow_08spp
8	0.12	53.84	Meadow_08spp
8	0.22	289.13	Meadow_08spp
8	0.22	212.83	Meadow_08spp
8	0.33	97.21	Meadow_08spp
8	0.09	18.58	Meadow_08spp
8	0.16	155.16	Meadow_08spp
8	0.1	75.4	Meadow_08spp
8	0.22	134.49	Meadow_08spp
8	0.15	104.05	Meadow_08spp
8	0.21	124.66	Meadow_08spp
8	0.16	81.03	Meadow_08spp
8	0.28	228.38	Meadow_08spp
8	0.61	219.63	Meadow_08spp
8	0.4	145.21	Meadow_08spp
8	0.17	19.89	Meadow_08spp
8	0.24	228.61	Meadow_08spp
8	0.21	55.89	Meadow_08spp
8	0.2	256.78	Meadow_08spp
8	0.13	141.37	Meadow_08spp
8	0.28	131.8	Meadow_08spp
8	0.12	28.95	Meadow_08spp
16	0.31	195.3	Meadow_16spp
16	0.64	292.6	Meadow_16spp
16	0.79	291.13	Meadow_16spp
16	0.23	270.64	Meadow_16spp
16	0.53	479.06	Meadow_16spp
16	0.23	264.36	Meadow_16spp
16	0.53	529.13	Meadow_16spp
16	0.37	258.4	Meadow_16spp
16	0.44	320.46	Meadow_16spp
16	0.19	141.09	Meadow_16spp
16	0.26	273.56	Meadow_16spp
16	0.61	648.6	Meadow_16spp
16	0.48	216.11	Meadow_16spp
16	0.11	28.7	Meadow_16spp
16	0.33	197.27	Meadow_16spp
16	0.22	55.18	Meadow_16spp
16	0.47	327.39	Meadow_16spp
16	0.29	105.14	Meadow_16spp
16	0.52	256.8	Meadow_16spp
16	0.28	76.87	Meadow_16spp
16	0.37	322.7	Meadow_16spp
16	0.6	408.35	Meadow_16spp
16	0.52	257.55	Meadow_16spp
16	0.1	33.43	Meadow_16spp
16	0.43	164.01	Meadow_16spp
16	0.24	59.29	Meadow_16spp
16	0.36	335.17	Meadow_16spp
16	0.27	103.92	Meadow_16spp
16	0.45	240.03	Meadow_16spp
16	0.1	77.35	Meadow_16spp
16	0.43	389.89	Meadow_16spp
16	0.72	758.77	Meadow_16spp
16	0.77	458.8	Meadow_16spp
16	0.57	345.48	Meadow_16spp
16	0.7	634.16	Meadow_16spp
16	0.58	199.51	Meadow_16spp
16	0.69	647.39	Meadow_16spp
16	0.47	332.47	Meadow_16spp
16	0.52	518.31	Meadow_16spp
16	0.21	181.09	Meadow_16spp
16	0.24	250.2	Meadow_16spp
16	1.03	501.38	Meadow_16spp
16	0.48	147.92	Meadow_16spp
16	0.31	49.84	Meadow_16spp
16	0.44	131.26	Meadow_16spp
16	0.19	95.27	Meadow_16spp
16	0.29	231.34	Meadow_16spp
16	0.18	159.28	Meadow_16spp
16	0.4	209.92	Meadow_16spp
16	0.18	105.66	Meadow_16spp
16	0.21	101.23	Meadow_16spp
16	1.03	644.44	Meadow_16spp
16	0.81	351.03	Meadow_16spp
16	0.12	101.29	Meadow_16spp
16	0.73	386.41	Meadow_16spp
16	0.26	106.25	Meadow_16spp
16	0.57	404.56	Meadow_16spp
16	0.17	149.83	Meadow_16spp
16	0.45	175.43	Meadow_16spp
16	0.11	86.96	Meadow_16spp
16	0.55	316.93	Meadow_16spp
16	0.78	855.43	Meadow_16spp
16	0.7	718.31	Meadow_16spp
16	0.47	335.2	Meadow_16spp
16	0.8	572.2	Meadow_16spp
16	0.49	179.81	Meadow_16spp
16	0.81	828.28	Meadow_16spp
16	0.4	327.02	Meadow_16spp
16	0.71	724.01	Meadow_16spp
16	0.34	200.57	Meadow_16spp
16	0.33	224.59	Meadow_16spp
16	0.98	523.87	Meadow_16spp
16	0.56	157.9	Meadow_16spp
16	0.38	77.21	Meadow_16spp
16	0.59	281.76	Meadow_16spp
16	0.33	138.89	Meadow_16spp
16	0.72	447.7	Meadow_16spp
16	0.48	255.37	Meadow_16spp
16	0.62	477.93	Meadow_16spp
16	0.46	118.66	Meadow_16spp
16	0.56	332.48	Meadow_16spp
16	0.78	331.25	Meadow_16spp
16	0.56	316.26	Meadow_16spp
16	0.57	145.77	Meadow_16spp
16	0.55	787.88	Meadow_16spp
16	0.35	164.5	Meadow_16spp
16	0.59	1003.58	Meadow_16spp
16	0.48	208.8	Meadow_16spp
16	0.37	392.27	Meadow_16spp
16	0.25	141.65	Meadow_16spp
16	0.21	298.48	Meadow_16spp
16	0.83	984.45	Meadow_16spp
16	0.57	800.18	Meadow_16spp
16	0.48	93.77	Meadow_16spp
16	0.62	856.78	Meadow_16spp
16	0.5	291.82	Meadow_16spp
16	0.85	1170	Meadow_16spp
16	0.56	327.27	Meadow_16spp
16	0.57	462.87	Meadow_16spp
16	0.41	145.19	Meadow_16spp
16	0.37	472.73	Meadow_16spp
16	0.86	648.48	Meadow_16spp
16	0.69	287.88	Meadow_16spp
16	0.53	200	Meadow_16spp
16	0.45	570.52	Meadow_16spp
16	0.52	398.49	Meadow_16spp
16	0.65	414.56	Meadow_16spp
16	0.42	315.67	Meadow_16spp
16	0.49	326.13	Meadow_16spp
16	0.07	147.11	Meadow_16spp
16	0.21	197.5	Meadow_16spp
16	0.68	262.73	Meadow_16spp
16	0.66	189.28	Meadow_16spp
16	0.12	61.08	Meadow_16spp
16	0.34	191.93	Meadow_16spp
16	0.13	99.01	Meadow_16spp
16	0.31	334.35	Meadow_16spp
16	0.2	180.7	Meadow_16spp
16	0.3	205.03	Meadow_16spp
16	0.17	63.53	Meadow_16spp
16	0.51	199.73	Meadow_16spp
16	0.97	483.45	Meadow_16spp
16	0.82	316.37	Meadow_16spp
16	0.58	130.17	Meadow_16spp
16	0.63	885.48	Meadow_16spp
16	0.38	158.58	Meadow_16spp
16	0.59	483.8	Meadow_16spp
16	0.43	235.43	Meadow_16spp
16	0.45	684.67	Meadow_16spp
16	0.36	159.7	Meadow_16spp
16	0.42	321.58	Meadow_16spp
16	0.64	264.88	Meadow_16spp
16	1.01	645.54	Meadow_16spp
16	0.52	270.32	Meadow_16spp
16	0.72	562.04	Meadow_16spp
16	0.48	345.95	Meadow_16spp
16	0.48	487.25	Meadow_16spp
16	0.44	170	Meadow_16spp
16	0.52	343	Meadow_16spp
16	0.28	103.17	Meadow_16spp
60	0.58	482.06	Meadow_60spp
60	0.93	537.35	Meadow_60spp
60	0.87	667.26	Meadow_60spp
60	0.5	168.02	Meadow_60spp
60	0.75	606.83	Meadow_60spp
60	0.53	472.38	Meadow_60spp
60	0.72	1059.89	Meadow_60spp
60	0.53	332.5	Meadow_60spp
60	0.71	576.52	Meadow_60spp
60	0.27	134.4	Meadow_60spp
60	0.47	371.36	Meadow_60spp
60	0.83	547.65	Meadow_60spp
60	0.68	550.48	Meadow_60spp
60	0.5	206.01	Meadow_60spp
60	0.77	753.75	Meadow_60spp
60	0.57	298.98	Meadow_60spp
60	0.88	803.93	Meadow_60spp
60	0.51	341.75	Meadow_60spp
60	0.72	763.23	Meadow_60spp
60	0.44	248.73	Meadow_60spp
60	0.25	342.43	Meadow_60spp
60	0.77	402.58	Meadow_60spp
60	0.79	509.11	Meadow_60spp
60	0.48	379.29	Meadow_60spp
60	0.73	649.49	Meadow_60spp
60	0.47	309.49	Meadow_60spp
60	0.81	991.04	Meadow_60spp
60	0.57	247.05	Meadow_60spp
60	0.72	348.83	Meadow_60spp
60	0.39	166.68	Meadow_60spp
60	0.38	457.43	Meadow_60spp
60	0.9	375.49	Meadow_60spp
60	0.72	348.51	Meadow_60spp
60	0.5	335.65	Meadow_60spp
60	0.62	656.24	Meadow_60spp
60	0.54	353.57	Meadow_60spp
60	0.8	907.59	Meadow_60spp
60	0.6	592.92	Meadow_60spp
60	0.66	555.93	Meadow_60spp
60	0.44	173.32	Meadow_60spp
14	0.17	328.01	Wetland
6	0.18	255.97	Wetland
11	0.18	281.49	Wetland
11	0.18	377.82	Wetland
7	0.19	249.53	Wetland
13	0.19	429.18	Wetland
7	0.2	369.16	Wetland
12	0.2	557.66	Wetland
4	0.2	489.78	Wetland
7	0.2	254.79	Wetland
9	0.2	358.2	Wetland
5	0.2	623.27	Wetland
14	0.2	405.02	Wetland
10	0.2	309.54	Wetland
15	0.2	324.98	Wetland
9	0.21	483.02	Wetland
5	0.21	308.83	Wetland
5	0.21	400.35	Wetland
15	0.21	380.45	Wetland
9	0.22	419.34	Wetland
7	0.22	361.54	Wetland
6	0.22	314.61	Wetland
11	0.22	536.11	Wetland
8	0.23	343.57	Wetland
9	0.23	364.91	Wetland
7	0.23	355.72	Wetland
11	0.23	444.36	Wetland
5	0.23	345.97	Wetland
10	0.23	603.38	Wetland
5	0.24	294.16	Wetland
7	0.24	456.89	Wetland
10	0.24	255.38	Wetland
8	0.24	268.12	Wetland
9	0.24	337.26	Wetland
5	0.24	421.29	Wetland
11	0.25	258.96	Wetland
7	0.25	663.52	Wetland
4	0.25	294.84	Wetland
6	0.26	370.88	Wetland
5	0.26	413.55	Wetland
9	0.26	443.33	Wetland
3	0.26	626.17	Wetland
10	0.26	392.09	Wetland
6	0.27	261.97	Wetland
7	0.27	551.23	Wetland
9	0.27	422.27	Wetland
8	0.27	279.54	Wetland
10	0.27	310.98	Wetland
7	0.27	243.25	Wetland
10	0.28	167.89	Wetland
9	0.28	262.58	Wetland
5	0.28	401.28	Wetland
7	0.28	553.79	Wetland
9	0.28	369.16	Wetland
6	0.28	456.89	Wetland
7	0.28	336.48	Wetland
4	0.28	357.38	Wetland
9	0.28	443.33	Wetland
6	0.28	348.38	Wetland
5	0.28	405.96	Wetland
7	0.28	487.52	Wetland
6	0.28	270.61	Wetland
9	0.28	620.39	Wetland
5	0.28	601.98	Wetland
10	0.29	341.19	Wetland
7	0.29	379.57	Wetland
6	0.29	422.27	Wetland
4	0.29	249.53	Wetland
5	0.29	294.84	Wetland
3	0.29	244.38	Wetland
7	0.29	544.88	Wetland
8	0.29	610.41	Wetland
6	0.29	424.23	Wetland
5	0.3	402.21	Wetland
7	0.3	375.2	Wetland
4	0.3	525.05	Wetland
6	0.3	534.87	Wetland
7	0.3	582.76	Wetland
5	0.3	505.94	Wetland
6	0.3	310.98	Wetland
3	0.3	386.67	Wetland
5	0.31	415.48	Wetland
7	0.31	712.94	Wetland
3	0.31	632	Wetland
5	0.31	520.2	Wetland
7	0.31	551.23	Wetland
6	0.31	601.98	Wetland
7	0.31	616.09	Wetland
3	0.31	436.2	Wetland
4	0.31	648.32	Wetland
6	0.31	257.76	Wetland
5	0.31	374.33	Wetland
2	0.31	452.67	Wetland
3	0.31	194.73	Wetland
4	0.31	481.9	Wetland
5	0.31	690.18	Wetland
6	0.32	299.66	Wetland
3	0.32	501.27	Wetland
2	0.32	384.89	Wetland
6	0.32	463.29	Wetland
5	0.32	423.25	Wetland
3	0.32	582.76	Wetland
4	0.32	542.36	Wetland
3	0.32	714.6	Wetland
6	0.32	564.16	Wetland
5	0.33	432.17	Wetland
6	0.33	316.8	Wetland
4	0.33	607.59	Wetland
5	0.34	477.46	Wetland
3	0.34	492.06	Wetland
4	0.34	537.36	Wetland
3	0.34	387.57	Wetland
7	0.34	596.42	Wetland
4	0.34	611.82	Wetland
3	0.34	811.74	Wetland
2	0.35	624.72	Wetland
5	0.35	665.06	Wetland
3	0.35	503.6	Wetland
2	0.35	753.72	Wetland
4	0.35	464.36	Wetland
3	0.35	640.85	Wetland
5	0.36	372.6	Wetland
4	0.36	538.61	Wetland
2	0.37	703.1	Wetland
2	0.37	468.69	Wetland
4	0.37	526.27	Wetland
3	0.38	565.47	Wetland
2	0.38	548.68	Wetland
2	0.38	698.23	Wetland
3	0.39	739.87	Wetland
1	0.4	632	Wetland
2	0.4	671.25	Wetland
3	0.41	836.57	Wetland
3	0.43	796.83	Wetland
3	0.43	722.93	Wetland
2	0.44	828.85	Wetland
2	0.45	896.8	Wetland
2	0.46	911.47	Wetland
2	0.5	876.26	Wetland
2	0.5	909.36	Wetland
	0.75	381.84	Wetland
	1.1	362.08	Wetland
	1.34	483.24	Wetland
	2.15	1445.12	Wetland
	0.9	781.56	Wetland
	1.52	500.2	Wetland
	0.87	513.4	Wetland
	1.02	345.48	Wetland
	0.78	311.48	Wetland
	0.95	415.92	Wetland
	0.8	590.8	Wetland
	1.1	445.48	Wetland
	0.94	779	Wetland
	0.67	241.04	Wetland
	0.65	287.88	Wetland
	0.67	436.52	Wetland
	0.87	265.24	Wetland
	0.55	75.76	Wetland
	0.82	322.68	Wetland
	0.9	445.84	Wetland
	0.84	138.28	Wetland
	0.71	141.2	Wetland
	0.9	461.92	Wetland
	1.07	469.48	Wetland
	0.51	127.84	Wetland
	0.85	287.4	Wetland
	1.02	1794.08	Wetland
	1	590.88	Wetland
	1.01	608.32	Wetland
	0.87	575.16	Wetland
	0.75	228.68	Wetland
	0.88	359.6	Wetland
	0.45	80.96	Wetland
	1.02	941.68	Wetland
	0.72	553.44	Wetland
	0.5	412.52	Wetland
	0.52	573.12	Wetland
	0.7	557.08	Wetland
	1.22	674.6	Wetland
	0.96	413.92	Wetland
	0.82	195.6	Wetland
	0.5	411.96	Wetland
